# Supplementary material for: Ten-year return levels of sub-daily extreme precipitation over Europe
Source: Copernicus journal article supplement (doi:10.5194/essd-13-983-2021), 2021-03-11
Supplement: Supplementary file 1 [file essd-13-983-2021-supplement.pdf]

Supplement of Earth Syst. Sci. Data, 13, 983–1003, 2021  
<https://doi.org/10.5194/essd-13-983-2021-supplement>  
© Author(s) 2021. This work is distributed under  
the Creative Commons Attribution 4.0 License.

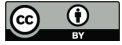

*Supplement of*

## **Ten-year return levels of sub-daily extreme precipitation over Europe**

**Benjamin Poschlod et al.**

*Correspondence to:* Benjamin Poschlod (Benjamin.Poschlod@lmu.de)

The copyright of individual parts of the supplement might differ from the CC BY 4.0 License.

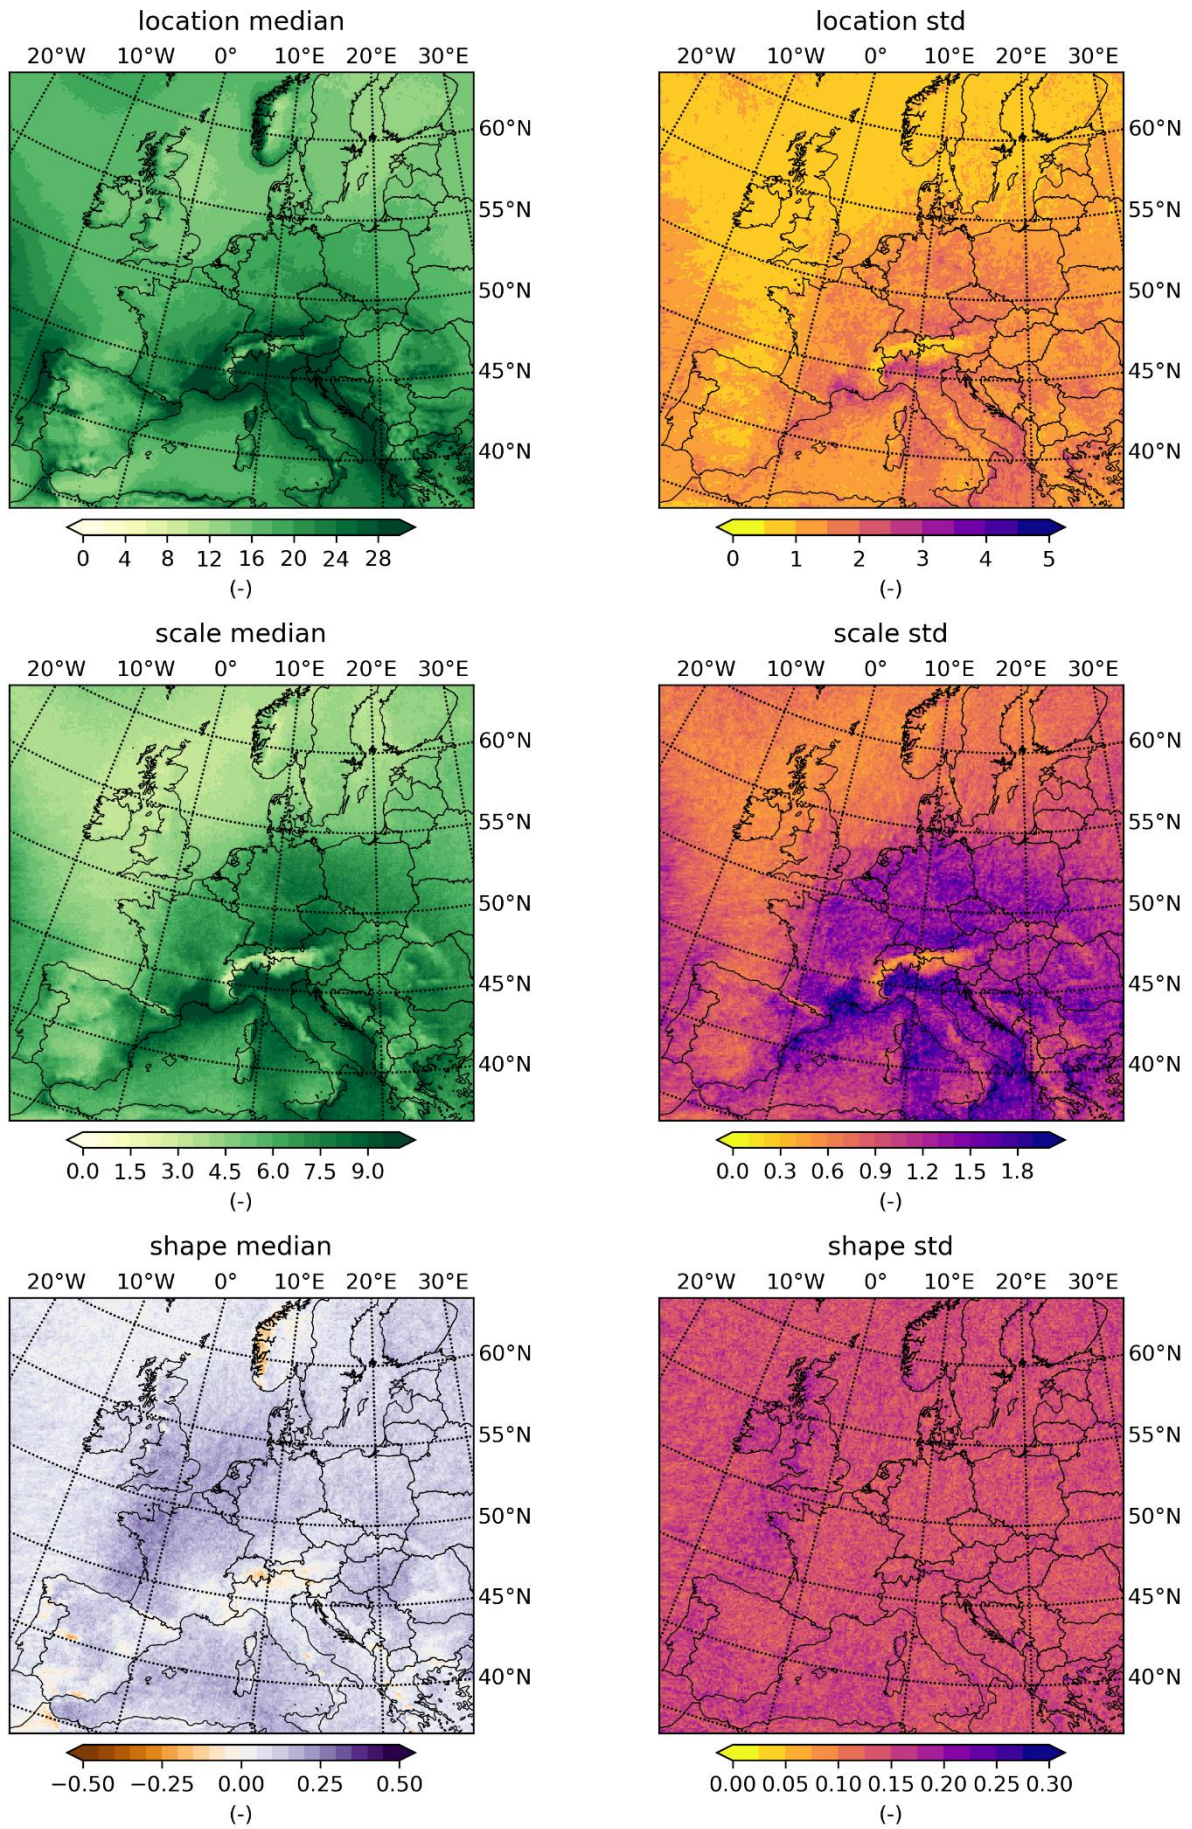

Figure S1: Median and standard deviation (std) of the three GEV parameters regarding the 50 CRCM5-LE members.
